# Supplementary material for: Bioaerosol Concentration in a Cattle Feedlot in Neuquén, Argentina
Source: MDPI journal article supplement (doi:10.3390/atmos13111761), 2022-10-26
Supplement: s1 [file s1]

## Supplementary information

**Table S1. Concentration of bacteria *E. Coli* in active sampling in LPR feedlot pens on 20th February 2020.** Sampling site, local time (H, HH:MM), Pump output (Q, L/min), sampling period (t, min), sampling volume (V, m<sup>3</sup>), count (R, CFU (colony forming units)), count of *E. coli* per m<sup>3</sup> of air (R, CFU/m<sup>3</sup>).

| ID                       | A1    | A2    | A3    | A4        | A5    | A6    | A7    |
|--------------------------|-------|-------|-------|-----------|-------|-------|-------|
| Sampling site            | M2    | M1    | M3    | M4        | M5    | M6    | M8    |
| H                        | 11:40 | 11:46 | 12:01 | 12:26     | 12:35 | 12:55 | 13:26 |
| Q (L/min)                | 30    | 30    | 30    | 30        | 30    | 30    | 30    |
| t (min)                  | 1     | 1     | 1     | 10        | 1     | 1     | 1     |
| V (m <sup>3</sup> )      | 0.03  | 0.03  | 0.03  | 0.3       | 0.03  | 0.03  | 0.03  |
| R (CFU)                  | 0     | 37    | 39    | Very high | 22    | 89    | 2     |
| R (CFU/ m <sup>3</sup> ) | 0     | 1233  | 1300  | Very high | 733   | 2967  | 67    |

**Table S2. Concentration of *E. coli* in active sampling around LPR feedlot pens on 20th February 2020.** Sampling site, local time (H, HH:MM), Pump output (Q, L/min), sampling period (t, min), sampling volume (V, m<sup>3</sup>), *E. coli* colonies number (N, CFU (colony forming units)), *E. coli* concentration (C, CFU/m<sup>3</sup>), w/c: saturated Petri dishes without count.

| ID                        | A8    | A9    | A10   | A11   | A12   | A13   |
|---------------------------|-------|-------|-------|-------|-------|-------|
| Sampling site             | M9    | M10   | M12   | M13   | M14   | M15   |
| H                         | 13:35 | 13:45 | 13:55 | 14:05 | 14:15 | 14:26 |
| Q (L/min)                 | 30    | 30    | 30    | 30    | 30    | 30    |
| t (min)                   | 1     | 3     | 3     | 3     | 5     | 10    |
| V (m <sup>3</sup> )       | 0.3   | 0.90  | 0.9   | 0.9   | 0.15  | 0.3   |
| N (CFU)                   | w/c   | 10    | 3     | w/c   | 3     | w/c   |
| C (CFU / m <sup>3</sup> ) | w/c   | 111   | 33    | w/c   | 20    | w/c   |

**Table S3. Concentration of *E. coli* in active sampling in LPR feedlot pens on 5th April 2022.** Sampling site, local time (H, hh:mm), Pump output (Q, L/min), **no/ r: without count**, sampling period (t, min), sampling volume (V, m<sup>3</sup>), *E. coli* colonies number (N, CFU (colony forming units)), *E. coli* concentration (C, CFU/m<sup>3</sup>). w/c: saturated Petri dishes without count.

| ID                       | A2    | A18   | A16   | A15    | A14   | A21   | A22   | A23   | A24   |
|--------------------------|-------|-------|-------|--------|-------|-------|-------|-------|-------|
| Sampling site            | M7    | M5    | M2    | M1     | M20   | M21   | M16   | M23   | M23   |
| H                        | 12:05 | 12:23 | 12:35 | 12:45  | 12:53 | 13:03 | 13:15 | 13:45 | 14:08 |
| Q (l/min)                | 30    | 30    | 30    | 30     | 30    | 30    | 30    | 30    | 30    |
| t (min)                  | 1     | 1     | 1     | 1.06   | 1     | 3     | 3     | 3     | 10    |
| V (m <sup>3</sup> )      | 0.03  | 0.03  | 0.03  | 0.0318 | 0.03  | 0.09  | 0.09  | 0.09  | 0.3   |
| N (CFU)                  | w/c   | 1     | 0     | 0      | 0     | 1     | 0     | 0     | 0     |
| C (CFU/ m <sup>3</sup> ) | w/c   | 33    | 0     | 0      | 0     | 11    | 0     | 0     | 0     |

**Table S4. Deposition of bacteria *E. Coli* in passive sampling in LPR feedlot pens on 5th April 2022.** Sampling site, sampling period (t, min), *E. coli* colonies number (N, CFU (colony forming units)), *E. coli* deposition rate (DR, CFU/m<sup>2</sup> s) w/c: saturated Petri dishes without count.

| ID                        | P6    | P7    | P8    | P9    | P10 | P11   | P12   |
|---------------------------|-------|-------|-------|-------|-----|-------|-------|
| Sampling site             | M11   | M5    | M5    | M2    | M2  | M1    | M1    |
| t (min)                   | 30    | 10    | 30    | 10    | 30  | 10    | 30    |
| C (CFU)                   | 12    | 6     | 15    | 1     | w/c | 1     | 3     |
| DR (CFU/m <sup>2</sup> s) | 2.096 | 3.144 | 2.620 | 0.524 | w/c | 0.524 | 0.524 |

**Table S5. Deposition of *E. coli* in the passive sampling around the LPR feedlot pens on 5th April 2022.** Sampling site, sampling period (t, min), *E. coli* colonies number (N, CFU (colony forming units)), *E. coli* deposition rate (DR, CFU/m<sup>2</sup> s), w/c: saturated Petri dishes without count.

| ID                              | P13   | P14 | P15 | P16   | P17 | P18   | P19   | P20   | P21   |
|---------------------------------|-------|-----|-----|-------|-----|-------|-------|-------|-------|
| <b>Sampling site</b>            | M21   | M21 | M20 | M20   | M17 | M17   | M18   | M19   | M21   |
| <b>t (min)</b>                  | 10    | 30  | 10  | 30    | 10  | 30    | 30    | 30    | 30    |
| <b>C (CFU)</b>                  | 1     | w/c | w/c | 9     | w/c | 4     | 2     | 1     | 3     |
| <b>DR (CFU/m<sup>2</sup> s)</b> | 0.524 | w/c | w/c | 1.572 | w/c | 0.699 | 0.349 | 0.175 | 0.524 |
